# Supplementary material for: Multiplex sequencing of paired-end ditags (MS-PET): a strategy for the ultra-high-throughput analysis of transcriptomes and genomes
Source: PubMed Central journal article supplement — Nucleic Acids Res. 2006 Jul 13;34(12):e84. doi: 10.1093/nar/gkl444 (PMC1524903; doi:10.1093/nar/gkl444), 2006-07-13
Supplement: nar_34_12_e84__1.pdf [file nar_34_12_e84__1.pdf]

**Supplementary Information**

1. Cloning vector pGIS4a for GIS-PET library
2. Cloning vector pGIS3h for ChIP-PET library
3. Mapping of GIS-PET identified transcripts
4. Distribution of homopolymer errors in GIS-PETs
5. Transcripts identified by MS-PET analysis of transcripts
6. Reduction of noise from MS-PET analyzed ChIP-PET clusters
7. List of references used in Supplementary Information

### 1. Cloning vector pGIS4a for GIS-PET library

#### Supplementary Figure 1. Cloning vector pGIS4a and relevant vector sequence.

The pGIS4a vector is designed for flcDNA cloning. Sequential BseRI and BamHI digestion releases an asymmetric PET that can be subsequently dimerized into diPETs for MS-PET sequencing analysis.

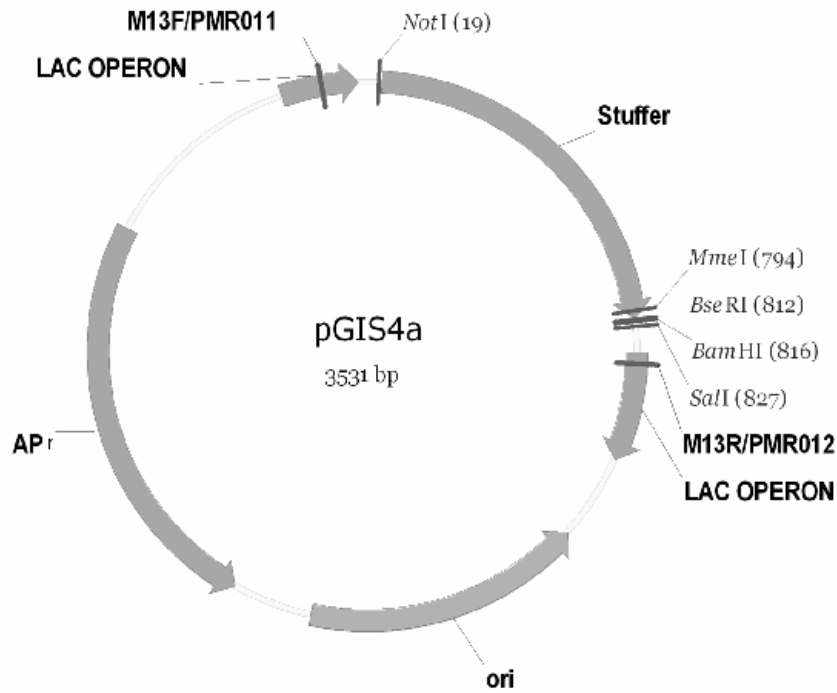

```

                NotI
                -----
1      GGGCGAATTC GATATCGCGG CCGCCCTCG AATAAGTCAG CAGCTTCCAC GCCAGCTTCA CACAAAAAGT GACTGACGGT AGCGCCGCGG CGGTGCAGGA
101    CCGCTTAAAG CTATAGCCGC GGC GCGGACC TATTTCACTC GTCGAAGCTG CCGTCCGAAGT GTCTTTT TCA CTGACTGCCA TCGCCCGCGC GCCACGTCTT
151    AGSTCAGGGC GATCTGTGGG TGA AACCTTC AACTTATTC AACTGGCATA TGACACAACC TGATGAAAGC ATTCTGGTTT CTGACGGTAA AACACTGTGG
201    TCCAGTCCCG CTAGACACCC ACTTTGCAGG TTTGAATAAG TTGACCGTAT ACTCTGTTGC ACTACTTTCG TAAGACCAA A GACTGCCATT TTGTGACACC
251    TTCTATAACC CGTTCGTTGA GCAAGCTACC GCAACCTGGC TGAAGATGC CACCGCTAAT ACGCCGTTA TCCGTATTGC CCGCAACCAG TCCACGGACT
301    AAGATATTGG GCAAGCAAAC CTTCGGATGC CGTTGGACCG ACTTCTACCG GTGCCAATTA TGCCGCAAAAT ACGACTAACG GCGCTTGGTC AGGTCCCTGA
351    GGCAGCAGTA CAATATCAAA CAGAATGCCG ATGACTTTGT CTTGACCGCG AAAGCCAGCA ATGGCAATCT GAAGCACTTC ACCATTAAAG TGGGACGTGA
401    CCGTCTCAAT GTTATAGTTT CTC TTACCGC TACTGAAAACA GGACTGCGCG TTTCGGTCCG TACCCTTAGA CTTCCGCAAG TGGTAATTGC ACCCTGCAC
451    TGGCACAAAT CACTACTTTA CGCGCGTGGG GCAGGACGAT CAGCGCAGCA GTTATCAACT GAAATCCGAG CAAAATGGGG CTGTGGATGC AGCCAAATTT
501    ACCGTGTTAG GTAGTCAAAT CGCGCCACCT CGTCCGCTA CTCGCGTCT CAATAGTTGA CTTTAGGCTC GTTTTACCCG GACACCTAAG TCGCTTTAAA
551    ACCCTCACCC CGCCGCAAGG CGTCACGGTA GATGATCAAC GTAACTAGAG GCACCTGAGT GAGCAATCTC TCGCTCGAT TTTGGGATAA TACTTTTCAA
601    TGGAACTGGG GCGCGCTTC GCACTGCCAT C TACTAGTTC CATTATCTC CGTGGACTCA CTGGTTAGAC AGCGACTTAA AAAGCTTATT ATGAAAAGTT
651    CCTCTGCGCG CGGCTATGCG GCCAGAAAAT TTAGCACAGT ATATCGGCCA GCAACATTTG CTGGCTGCGG GGAAGCCGTT GCGCGCGGCT ATCCAAAGCCG
701    GGAGACCGCG GGCATACCG CGGTCTTTTA AATCGTGTCA TATAGCGGCT CTTGTAAAAC GACCGACGCC CCTTCGGCAA GCGCGCGGCA TAGCTTCGGC
751    GGCATTACA TTCTATGATC CTC TGGGGGCG CGCGCGGTAC CGC AAAACA ACTCTCGCTC AACTGATTGC CCGCTATGCG AACGCTGATG TGGAACTAT
801    CCTAATATCT AAGATACTAG GAGACCCCGC GCGGCCCATG CCGCTTTTGT TGAGAGCGAC TTCACTAACC GCGCATACGG TTCCGACTAC ACCTTCGATA

                MmeI   BseRI
                -----
                BamHI   SalI
                -----
801    TTCTGCGCTA AGTGGATCC TCCTCGTGGG CCTGCAGGCA TGCAAGCTTG ACTATTCTAT AGTCTCACCT AAATAGCTTG GCGTAATCAT GGTCCATAGCT
                AAGACGGCAT TCAGCCTTAG AGGAGCAGCT GGACCCTCCG ACCTTCGAAAC TCATAAGATA TCACAGTGGG TTTATCGAAC CCGATTAGTA CCACTATCGA
    
```

## 2. Cloning vector pGIS3h for ChIP-PET library

### Supplementary Figure 2. Cloning vector pGIS 3h and relevant vector sequence.

The pGIS3h vector is used for ChIP-PET library construction to identify transcription factor binding sites. Digestion with BseRI followed by alkaline phosphatase treatment, and BamHI digestion, releases an asymmetric PET that can subsequently be dimerized via the BamHI cohesive site for diPET construction and MS-PET analysis.

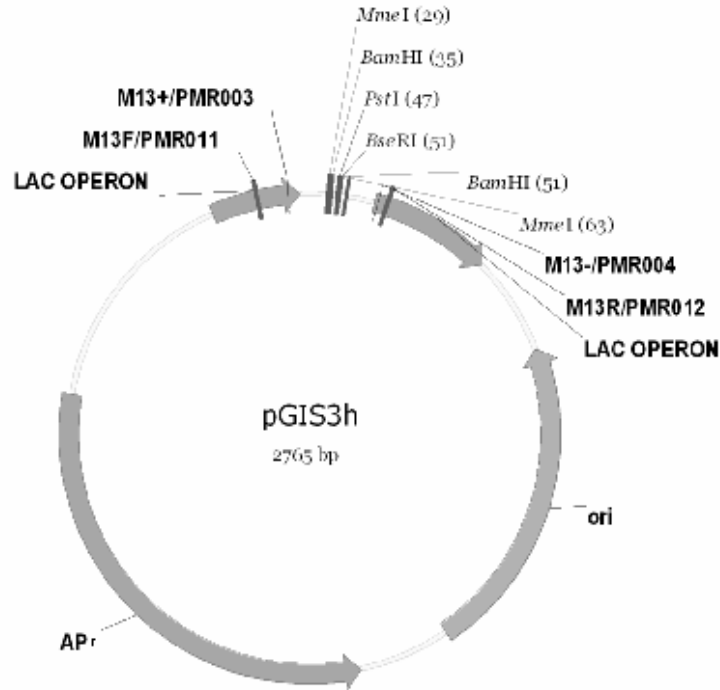

```

                MmeI      MmeI
                *        *
                *        *
    BamHI      PstI  BamHI      BseRI
    *          *          *          *
    *          *          *          *
1  GGGCGAATTC GATATCGCCG CCGCGAGGAT TATGGATCCG ACTGCAGTCG GATCCATACT CCTCATTGCA GGCATGCAGG CTTGAGTATT CTATAGTGTG
    CCGCCTTAAG CTATAGCGCC GCGCCTCCTA ATACCTAGGC TGCAGCTCAGC CTAGGTATGA GGAGTAAAGT CCGTACGTTT GAACTCATAA GATATCACAG
    
```

### 3. Mapping of GIS-PET identified transcripts

**Supplementary Table 1. Transcript mapping results of MS-PET analyzed MCF7 GIS-PET library**

The table provides an overview of the PET mapping statistics for the library without homopolymer error analysis.  
 “N.A.”, not available.

|                        | PETs           | % of total PETs | % of mapped PETs | PET clusters |
|------------------------|----------------|-----------------|------------------|--------------|
| Total PETs not mapped* | 156,286        | 49.78 %         | N.A.             | N.A.         |
| Total PETs mapped      | 157,697        | 50.22%          | 100.00%          | 22,992       |
| mapped once (1)        | 136,612        | 43.51%          | 86.63%           | 20,864       |
| mapped (2)             | 8,793          | 2.80%           | 5.58%            | 2,218        |
| mapped (3)             | 2,929          | 0.93%           | 1.86%            | 907          |
| mapped (4)             | 1,883          | 0.60%           | 1.19%            | 532          |
| mapped (5)             | 627            | 0.20%           | 0.40%            | 320          |
| mapped (6)             | 377            | 0.12%           | 0.24%            | 235          |
| mapped (7)             | 271            | 0.09%           | 0.17%            | 214          |
| mapped (8)             | 268            | 0.09%           | 0.17%            | 108          |
| mapped (9)             | 112            | 0.04%           | 0.07%            | 120          |
| mapped (10)            | 163            | 0.05%           | 10.00%           | 83           |
| mapped (>10)           | 5,662          | 1.80%           | 3.59%            | N.A.         |
| <b>Total PETs</b>      | <b>313,983</b> | <b>100.00%</b>  | <b>N.A.</b>      | <b>N.A.</b>  |

\* Before homopolymer error analysis

**Supplementary Table 2. Transcript mapping results of Sanger capillary sequenced MCF7 GIS-PET library**

|                       | PETs           | % of total PETs | % of mapped PETs | PET clusters |
|-----------------------|----------------|-----------------|------------------|--------------|
| Total PETs not mapped | 33,097         | 24.38%          | N.A.             | N.A.         |
| Total PETs mapped     | 102,660        | <b>75.62%</b>   | 100.00%          | 12,996       |
| mapped once (1)       | 92,928         | 68.45%          | 90.52%           | 11,513       |
| mapped (2)            | 4,691          | 3.46%           | 4.57%            | 1,641        |
| mapped (3)            | 1,311          | 0.97%           | 1.28%            | 616          |
| mapped (4)            | 754            | 0.56%           | 0.73%            | 363          |
| mapped (5)            | 332            | 0.24%           | 0.32%            | 271          |
| mapped (6)            | 190            | 0.14%           | 0.19%            | 172          |
| mapped (7)            | 119            | 0.09%           | 0.12%            | 144          |
| mapped (8)            | 61             | 0.04%           | 0.06%            | 96           |
| mapped (9)            | 29             | 0.02%           | 0.03%            | 81           |
| mapped (10)           | 32             | 0.02%           | 0.03%            | 52           |
| mapped (>10)          | 0              | 0.00%           | 0.00%            | 0            |
| <b>Total PETs</b>     | <b>135,757</b> | <b>100.00%</b>  | <b>N.A.</b>      | <b>N.A.</b>  |



set of 11,077 PETs within the single-locus-match (PET1) category). Conversely, we were able to identify 2,032 recovered PETs (putative undercall errors) corresponding to 46 transcripts defined by an existing 12,812 PETs within the PET1 category. By aligning the newly-recovered PETs with the corresponding pre-existing PETs (that were readily mapped to the same transcript during first-pass mapping), the percentage of error in each category could then be calculated by the formula:

Percentage error per homopolymer category =  $x / (n * y)$ , where  $x$  = the number of cases (PETs) recovered, and  $n$  = total number of sites of homopolymer length  $y$  (in both the recovered ditags plus the matching pre-existing PETs), and the multiplication by  $y$  is necessary to take into consideration the total number of nucleotides that were sequenced.

Our data (Supplementary Figure 4) shows that the occurrence of errors within the homopolymer regions appears to increase with homopolymer length, with a peak at homopolymer length = 5 bases. Furthermore, insertion errors (overcalls) are more prevalent. This is consistent with our scavenging results above, where we found that the parameter “allow-1-deletion” was more important than “allow-1-insertion” with regard to recovering accurate ditags (in other words, there were quantitatively more ditags that were rendered unmappable due to the extraneous insertion of bases in homopolymer regions).

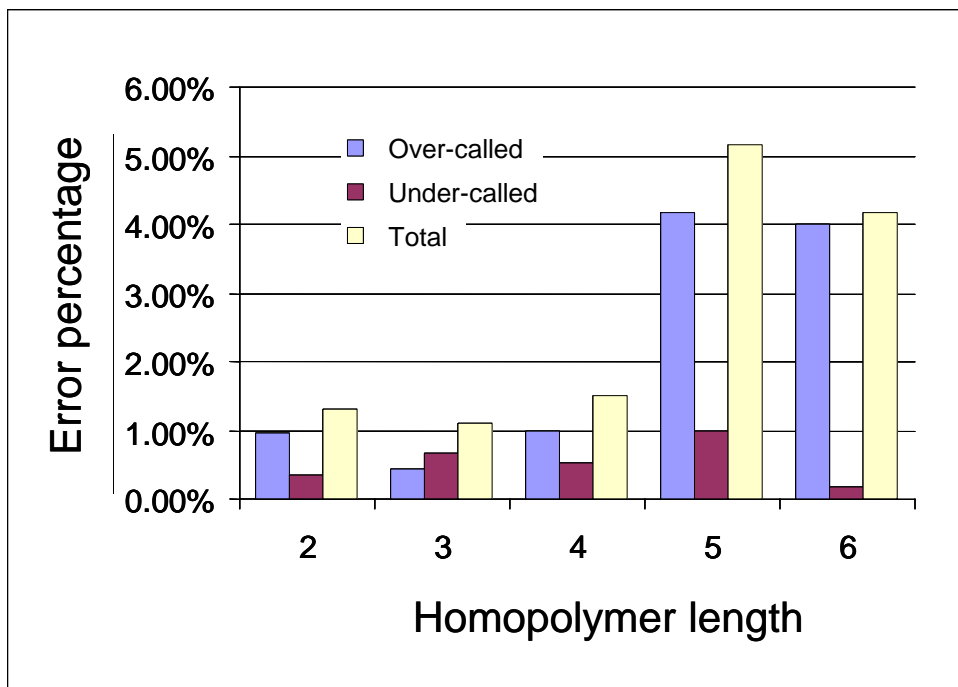

**Supplementary Figure 4. Error distribution across different homopolymer lengths**

The “Over-called” homopolymer errors contain an extra base in the homopolymer stretch compared to the reference genome sequence. The “Under-called” errors missed a base in the homopolymer stretch when compared to the reference genome sequence. “Total” errors are the sum of the two.

Errors in homopolymer regions are a known artifact of 454-sequencing, and the overall trend in error distribution, *viz.* that errors increase with increasing homopolymer length, is similar between our data and earlier published results (1). Although the published results indicated that undercall errors were predominant, in direct contrast with our own analysis, we have since established that this is a random rather than systematic phenomenon, and the relative proportion of insertion and deletion errors appear to be vary from one library to another (Du Lei, pers. comm.).

We also examined the distribution of homopolymers of varying lengths within both the pool 56,914 PETs that were recovered as described in the main text, and the pool of 136,612 PETs that could be mapped to unique chromosomal loci in the first-pass mapping. Supplementary Table 3 shows that the longer homopolymers (more specifically, the total number of bases sequenced in longer homopolymeric stretches) are more well-represented in the pool of recoverable PETs, compared to bases in homopolymer stretches of the same length within the first-pass-mapped PETs. We believe that this reflects the increased incidence of multiplex-sequencing errors with increasing homopolymer length, possibly coupled with decreased tag complexity, both these factors contributing to poorer mapping rates.

|                                                                           |              |              |             |             |             |             |
|---------------------------------------------------------------------------|--------------|--------------|-------------|-------------|-------------|-------------|
| Homopolymer distribution in 56,914 recovered PETs                         | H2           | H3           | H4          | H5          | H6          | H7+         |
| Total homopolymers in each class (n)                                      | 287,966      | 86,084       | 32,739      | 22,251      | 3,567       | 0           |
| Total bases sequenced in each class (n * homopolymer category)            | 575,932      | 258,252      | 130,956     | 111,255     | 21,402      | 0           |
| <b>Percentage of 2,054,944 total bases sequenced in all 56,914 PETs</b>   | <b>28.03</b> | <b>12.57</b> | <b>6.37</b> | <b>5.41</b> | <b>1.04</b> | <b>0.00</b> |
| Homopolymer distribution in 136,612 PET1s                                 | H2           | H3           | H4          | H5          | H6          | H7+         |
| Total homopolymers in each class (n)                                      | 676,142      | 216,325      | 74,030      | 32,764      | 5,252       | 0           |
| Total bases sequenced in each class (n * homopolymer category)            | 1,352,284    | 648,975      | 296,120     | 163,820     | 31,512      | 0           |
| <b>Percentage of 4,907,904 total bases sequenced in all 136,612 PET1s</b> | <b>27.55</b> | <b>13.22</b> | <b>6.03</b> | <b>3.33</b> | <b>0.64</b> | <b>0.00</b> |

**Supplementary Table 3. Representation of homopolymers in recovered PET0s vs first-pass-mapped PET1s.**

The table shows that there is a greater percentage of sequenced bases from long homopolymers in the PETs recovered by 1-base insertion/deletion (see main text), compared with sequenced bases from the same homopolymer category in PET1s. H2, 2-mer homopolymers; H7+, homopolymer stretches of 7 or more bases; PET1, PETs mapped to single (unique) chromosomal loci.



### 5. Transcripts identified by MS-PET

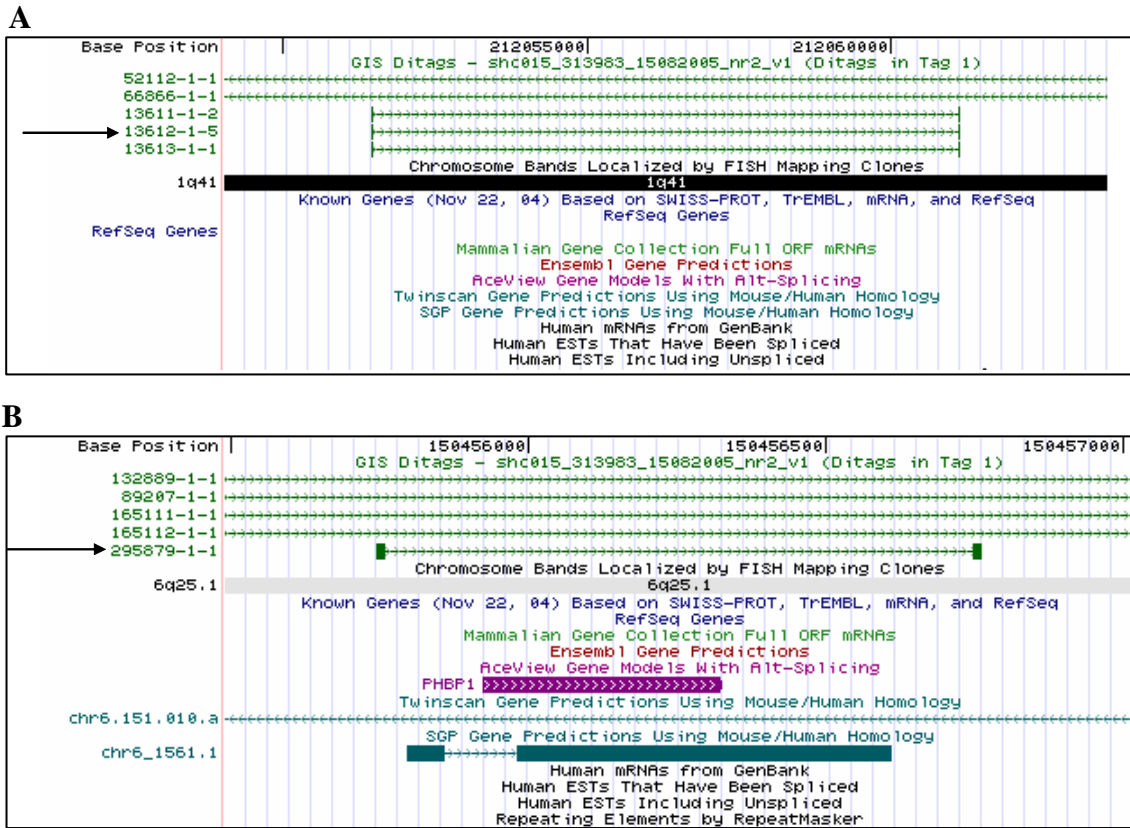

**Supplementary Figure 5. Examples of transcripts identified by MS-PET sequencing**

**A.** A total count of 8 GIS-PETs (3 PET sequences) mapped to a novel transcript within a gene desert region. **B.** One GIS-PET sequence was mapped to and validates a predicted gene.

## 6. Reduction of noise from MS-PET analyzed ChIP-PET clusters

In the 8,896 PETs (88.64% of the total 10,036 mapped ChIP-PET sequences) that mapped to single chromosomal loci, we found 843 PET sequences that were not identical but which nonetheless mapped to identical chromosomal locations, and therefore required merging to eliminate redundancy. This sequence variability we attributed to the phenomenon of MmeI enzyme slippage which we previously observed (2), resulting in uncertainty at the interface of 5' and 3' signatures within each PET. This merging process further reduced the number of PET sequences to 8,053. The majority (7,529) of these 8,053 PETs were aligned along the genome as singletons (i.e., only 1 PET per mapping locus), and were thus also removed as possible non-specific background noise, as authentic ChIP-enriched targets would be expected to form a cluster of PETs around the binding consensus sequence. The remaining 524 unique PETs formed 253 clusters containing 2 to 6 individual PETs per cluster, and therefore could be considered to be potential p53 binding sites (Supplementary Table 4).

### Supplementary Table 4. Mapping statistics of MS-PET sequenced p53 ChIP-PET data.

The table shows a detailed breakdown of the process of eliminating background noise.

|                                                                                                         |        |
|---------------------------------------------------------------------------------------------------------|--------|
| Total no. of PETs                                                                                       | 23,283 |
| Unique PET sequences remaining after merging identical PETs ( <b>Noise1</b> )                           | 22,687 |
| PETs not mapped to hg17                                                                                 | 12,651 |
| PETs mapped                                                                                             | 10,036 |
| PETs mapped to 1 chromosomal locus                                                                      | 8,896  |
| PETs mapped to 2+ loci                                                                                  | 1,140  |
| Of 8,896 single-locus PETs, no. of non-identical PETs mapping to same locus ( <b>Noise2</b> )           | 843    |
| no. of singletons ( <b>Noise3</b> )                                                                     | 7,529  |
| Single-locus PETs remaining after eliminating obvious noise sources ( <b>Noise2</b> and <b>Noise3</b> ) | 524    |
| no. of PETs overlapping with only $\leq 5$ bp end-difference ( <b>Noise4</b> )*                         | 397    |
| Single-locus PETs remaining after eliminating <b>Noise4</b>                                             | 127    |

\***Noise4** was obtained after detailed analysis of the poor initial correlation between this MS-PET analyzed dataset, and a larger Sanger capillary-sequenced ChIP-PET dataset (see text for details).

However, we observed that there was a poor initial correlation (71 of 253; 28.06%) between these 253 clusters and a larger dataset of 1,766 p53 binding sites identified in a previous ChIP-PET experiment (2). Closer examination revealed that a substantial number of PET clusters had their PET members essentially completely overlapping each other, with a difference in mapping of only a few bases at the ends. By determining the sum of end-differences for every PET sequence (S-value; defined as the length of each cluster minus the length of the region overlapped by every PET within that cluster), it was obvious that there was a marked bias in the distribution of PETs, with a far greater number of PETs displaying S-values  $\leq 5$ . In other words, there appeared to be a transition point at an S-value of 5 (Supplementary Figure 6), separating clusters comprising PETs that were much closer together, from those that were  $>5$  bp apart (both ends considered).

The reason for this was revealed by closer visual examination of all 524 PET sequences: 397 PETs (196 clusters) with S-values  $\leq 5$  were in fact *identical* apart from minor variations, and had therefore formed artifactual clusters when it should instead have been a singleton. These variations (resulting in a 5 bp error shared between both ends) were due to a combination of homopolymer errors attributable to multiplex sequencing and terminal mismatches (Supplementary Table 5), which are likely an artifact of the end-polishing procedure used in sequencing library construction. Single-base miscalls within homopolymers accounted for 105/196 or 53.57% of the errors.

This noise reduction process enabled the refinement of a final list of 57 clusters comprising 127 PETs of S-values  $>5$ , which, as described in the main text, proved to be high-confidence p53 binding sites. In summary, the data showed that MS-PET generated ChIP-PET data could indeed be used to rapidly identify TFBS. Although, compared to Sanger-sequenced ChIP-PETs, additional errors resulting in the formation of artifactual clusters were present, these could be resolved by modifying the clustering algorithms to take into consideration PET sequences that should be merged after allowing for the presence of single-base insertions or deletions within homopolymers.

The 57 putative p53 binding loci identified in this study were compared with p53 binding loci determined by PET clusters in a previous study with a considerably larger dataset generated by Sanger capillary sequencing. The result is presented in Supplementary Table 6.

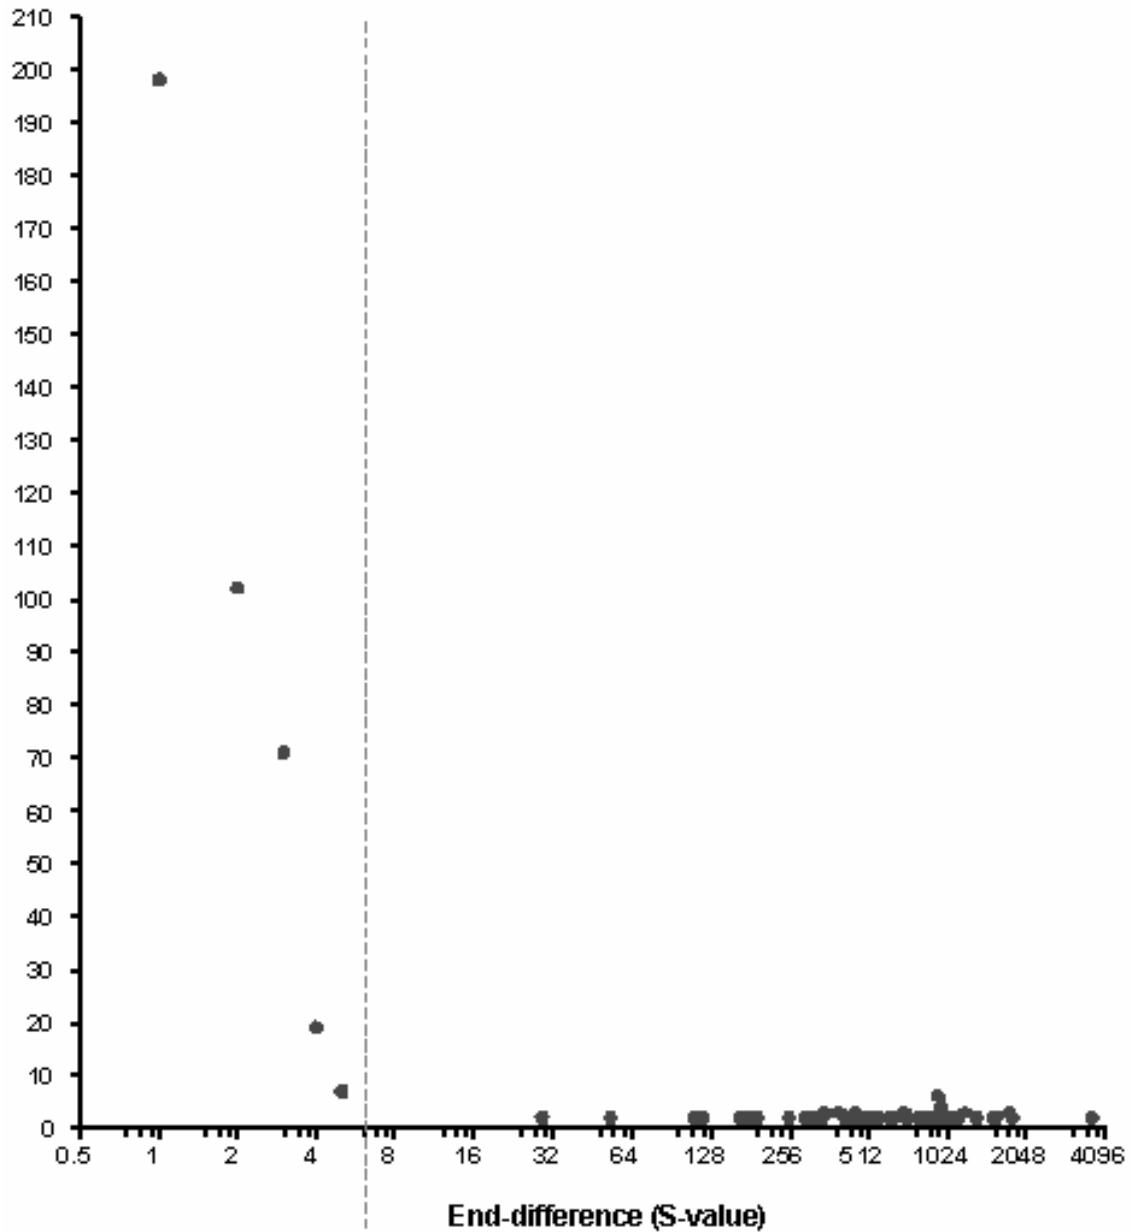

**Supplementary Figure 6.** Determining the end-difference cutoff value (that we termed S-value) in all ChIP-PET clusters (253 clusters of 524 PETs). The graph is a plot of the number of PETs at each corresponding S-value (see Supplementary Table 5). The vast majority of PETs (397 PETs in 205 clusters) appear to be concentrated at S-value  $\leq 5$ .

**Supplementary Table 5. Noise-reduction analysis on MS-PET analyzed ChIP-PETs.**

After eliminating sources of alignment error (both insertion or deletion errors in homopolymer regions, attributable to multiplex sequencing, and errors that were not within homopolymer regions, attributable to molecular cloning procedures), it was discovered that all PETs with S-values  $\leq 5$  had in fact formed artifactual clusters; conversely, all clusters containing PETs with S-values  $>5$  were verified to be authentic, and were high-confidence p53 targets.

| End-difference value (S-value) | No. of PETs      | High-confidence clusters ( $\geq 2$ cluster members) | Homopolymer errors (insertions/deletions) | Non-homopolymer errors | No. of high-confidence clusters after eliminating errors |
|--------------------------------|------------------|------------------------------------------------------|-------------------------------------------|------------------------|----------------------------------------------------------|
| 1                              | 198              | 99                                                   | 51                                        | 48                     | 0                                                        |
| 2                              | 102              | 50                                                   | 26                                        | 24                     | 0                                                        |
| 3                              | 71               | 35                                                   | 20                                        | 15                     | 0                                                        |
| 4                              | 19               | 9                                                    | 6                                         | 3                      | 0                                                        |
| 5                              | 7                | 12                                                   | 2                                         | 1                      | 0                                                        |
| <b><math>&gt;5</math></b>      | 127              | 57                                                   | 0                                         | 4                      | 57                                                       |
|                                | Total PETs = 524 | Total clusters = 253                                 | Total errors = 105                        | Total errors = 95      |                                                          |

} “Noise”  
 from  
 false  
 clusters

**Supplementary Table 6. The 57 putative p53 binding loci identified by MS-PET sequencing analysis.**

After background noise reduction as described in the Supplementary Information, a final 57 PET clusters (containing 127 PETs) identified by MS-PET analysis of ChIP-PET data were matched with high correlation to a large, capillary sequenced dataset (2). “Cluster Size”, numbers of individual PETs in each cluster; “p53 binding motif”, identified using the p53PET model (2) or with \*MatInspector (3); “Nil”, no consensus binding site identified. \*\*3’half-site identified.

| PET clusters identified in this study by MS-PET sequencing |              |                           | PET clusters identified in previous study by Sanger capillary sequencing |              |                         |
|------------------------------------------------------------|--------------|---------------------------|--------------------------------------------------------------------------|--------------|-------------------------|
| Cluster ID                                                 | Cluster Size | Cluster Location          | Matching cluster ID                                                      | Cluster Size | p53 binding motif       |
| chr17.65114635                                             | 6            | chr17:65114635-65115683   | chr17.65114449                                                           | 18           | CTGCATGTCAGAACATGCC     |
| chr1.121096169                                             | 4            | chr1:121096169-121097192  | chr1.121096168                                                           | 27           | Nil                     |
| chr8.41795356                                              | 3            | chr8:41795356-41796055    | chr8.41794748                                                            | 10           | TAACCTGCCCAGACATGCCG    |
| chr8.128876297                                             | 3            | chr8:128876297-128877901  | chr8.128875604                                                           | 10           | ATACTGGCAGCGACAAGTTGA** |
| chr10.129551462                                            | 3            | chr10:129551462-129552379 | chr10.129551119                                                          | 9            | TGACTTGCCCAGACATGTCT    |
| chr19.32428502                                             | 3            | chr19:32428502-32430399   | chr19.32428502                                                           | 7            | Nil                     |
| chr19.15863930                                             | 3            | chr19:15863930-15865190   | chr19.15863930                                                           | 3            | CAGCATGCCTTGACATGCCT    |
| chr7.98979755                                              | 3            | chr7:98979755-98980587    | chr 7.98979755                                                           | 3            | TAACATGTAGGGACTTGCCTA*  |
| chr12.104298329                                            | 3            | chr12:104298329-104299628 | chr12.104298329                                                          | 2            | CCACATGGCCCGACCTGACTA*  |
| chr6.36751959                                              | 2            | chr6:36751959-36752472    | chr6.36751902                                                            | 13           | GAACATGTCCCAACATGTTG    |
| chr7.40530025                                              | 2            | chr7:40530025-40530784    | chr7.40529658                                                            | 10           | GGGCATGCCAGACAAGCCC     |
| chr15.78081823                                             | 2            | chr15:78081823-78083380   | chr15.78081823                                                           | 9            | AGGCGTGTTCCGACATGTCT    |
| chr12.15980549                                             | 2            | chr12:15980549-15981513   | chr12.15980549                                                           | 9            | AGACAGGACAGGACAGGACAG*  |
| chr4.40987514                                              | 2            | chr4:40987514-40988177    | chr4.40986864                                                            | 8            | GGGCATGTTGGGACATGCCT    |
| chr7.150822921                                             | 2            | chr7:150822921-150823498  | chr7.150822098                                                           | 8            | GAGCATGTCTGAACATGTTC    |
| chr6.110309910                                             | 2            | chr6:110309910-110310423  | chr6.110309889                                                           | 8            | AGACTTGCCTGGGCCTGTCC    |
| chr4.78620219                                              | 2            | chr4:78620219-78621486    | chr4.78620134                                                            | 7            | AGGCATGTTTGGACATGTCT    |
| chr8.143893708                                             | 2            | chr8:143893708-143894556  | chr8.143893708                                                           | 7            | ATGCTTGCCCAGGCATGTCC    |
| chr9.84083290                                              | 2            | chr9:84083290-84083913    | chr9.84083088                                                            | 7            | GCACATGCCTGGACATGTTT    |
| chr1.211001176                                             | 2            | chr1:211001176-211001907  | chr1.211000966                                                           | 7            | AAACATGTTGCAACATGTCC    |
| chr19.18335537                                             | 2            | chr19:18335537-18337042   | chr19.18335537                                                           | 6            | CAGCATGCCTTGACATGCCT    |

|                |   |                          |                |   |                         |
|----------------|---|--------------------------|----------------|---|-------------------------|
| chr12.826876   | 2 | chr12:826876-828182      | chr12.826876   | 6 | AGGCATGTGCCAACATGCC     |
| chr5.152171146 | 2 | chr5:152171146-152172316 | chr5.152171146 | 6 | TGACTTGCCCAGACATGTCC    |
| chr9.4778404   | 2 | chr9:4778404-4779001     | chr9.4778277   | 6 | GAGCATGCCTGTACATGCCT    |
| chr7.152123965 | 2 | chr7:152123965-152125102 | chr7.152123892 | 6 | TTACATGCCCCGGACATGCCA   |
| chr14.71310532 | 2 | chr14:71310532-71311108  | chr14.71310476 | 6 | GGGCTTGTCTAAGACATGCTC   |
| chr2.170903804 | 2 | chr2:170903804-170904541 | chr2.170903601 | 5 | GGGCATGCCCAACATGCCT     |
| chr7.61411725  | 2 | chr7:61411725-61413516   | chr7.61411725  | 5 | Nil                     |
| chr19.46725987 | 2 | chr19:46725987-46726762  | chr19.46725987 | 5 | GAACATGCCTGGGCACATTCA*  |
| chr6.112415080 | 2 | chr6:112415080-112416243 | chr6.112414685 | 5 | AGGCATGTCAGGGCCTGTCC    |
| chr8.103317718 | 2 | chr8:103317718-103318672 | chr8.103317718 | 4 | AGACATGCCTGGGCATGTCA    |
| chr12.27593036 | 2 | chr12:27593036-27594614  | chr12.27593036 | 4 | Nil                     |
| chr4.188216741 | 2 | chr4:188216741-188217836 | chr4.188216741 | 4 | GGACATGCCCCGGGCAAAGGCC* |
| chr17.46386144 | 2 | chr17:46386144-46387669  | chr17.46385667 | 4 | TGACAAGCCCAGACATGCAG    |
| chr2.51394754  | 2 | chr2:51394754-51396351   | chr2.51394754  | 3 | GGACATGAATGGACATGTCT    |
| chr17.52149611 | 2 | chr17:52149611-52150336  | chr17.52149611 | 3 | GAACATGCCCAGGCAAGCCC    |
| chr7.151206925 | 2 | chr7:151206925-151207691 | chr7.151206867 | 3 | GGGCATGTTGGCGCACGTCT    |
| chr11.34663350 | 2 | chr11:34663350-34663804  | chr11.34663117 | 3 | TTGCATGGCTGGGCAGGGACT*  |
| chr10.61917221 | 2 | chr10:61917221-61918285  | chr10.61917221 | 3 | AGGCATGCTCCACCATGCCT    |
| chr8.57980443  | 2 | chr8:57980443-57981801   | chr8.57981054  | 2 | TGACATGTTTGGGCATGTTG    |
| chr10.86274468 | 2 | chr10:86274468-86275311  | chr10.86274468 | 2 | GGGCTAGCCTGAGACATGCC    |
| chr1.227069711 | 2 | chr1:227069711-227070623 | chr1.227069711 | 2 | AGACAAGTTGAGACTTGCCC    |
| chr8.95072056  | 2 | chr8:95072056-95072992   | chr8.95072056  | 2 | AGACATGCCCAGGCAAACCC    |
| chr9.16627209  | 2 | chr9:16627209-16627911   | chr9.16627209  | 2 | GAACATGCAGGGGCAAGCCT    |
| chr12.34742184 | 2 | chr12:34742184-34746104  | chr12.34742184 | 2 | TGAGTTGAACACACATGTCAC** |
| chr1.3650125   | 2 | chr1:3650125-3652312     | chr1.3650125   | 2 | GTGCATGTACACGCATGCCTG*  |
| chr6.98126164  | 2 | chr6:98126164-98128173   | chr6.98126164  | 2 | AAACATGTCTGTTTCATGTTCT* |
| chr8.87596299  | 2 | chr8:87596299-87597941   | Chr8.87596299  | 2 | Nil                     |
| chr2.45356351  | 2 | chr2:45356351-45357648   | Chr2.45356351  | 2 | Nil                     |
| chr8.128235595 | 2 | chr8:128235595-128236621 | Chr8.128235595 | 2 | Nil                     |
| chr1.26300920  | 2 | chr1:26300920-26302190   | Chr1.2630092   | 2 | GGCCATGAAGGGGCTTGCCT*   |
| chr12.13282893 | 2 | chr12:13282893-13284049  | Chr12.13282893 | 2 | Nil                     |

|                |   |                          |                |   |                         |
|----------------|---|--------------------------|----------------|---|-------------------------|
| chr18.30704122 | 2 | chr18:30704122-30704951  | Chr18.30704122 | 2 | AGAGGGAGATGGGCAGGTCTC** |
| chr4.139909547 | 2 | chr4:139909547-139910275 | Chr4.139909547 | 2 | Nil                     |
| chr17.74162019 | 2 | chr17:74162019-74162946  | Chr17.74162019 | 2 | Nil                     |
| chr5.58290360  | 2 | chr5:58290360-58290516   | Chr5.58290360  | 1 | Nil                     |
| chr2.66053539  | 2 | chr2:66053539-66053605   | chr2.66053539  | 1 | Nil                     |



## 7. References Used in Supplementary Information

1. Margulies, M., Egholm, M., Altman, W.E., Attiya, S., Bader, J.S., Bemben, L.A., Berka, J., Braverman, M.S., Chen, Y.J., Chen, Z. *et al.* (2005) Genome sequencing in microfabricated high-density picolitre reactors. *Nature*, 437, 376-380.
2. Wei, C.L., Wu, Q., Vega, V.B., Chiu, K.P., Ng, P., Zhang, T., Shahab, A., Yong, H.C., Fu, Y., Weng, Z. *et al.* (2006) A global map of p53 transcription-factor binding sites in the human genome. *Cell*, 124, 207-219.
3. Quandt, K., Frech, K., Karas, H., Wingender, E. and Werner, T. (1995) MatInd and MatInspector - New fast and versatile tools for detection of consensus matches in nucleotide sequence data. *Nucleic Acids Res*, 23, 4878-4884.
